# Supplementary material for: Spatial and Topological Organization of DNA Chains Induced by Gene Co-localization
Source: PubMed Central journal article supplement (PMC2820526; doi:10.1371/journal.pcbi.1000678), 2010-02-12
Supplement: pcbi.1000678.s004.pdf [file pcbi.1000678.s004.pdf]

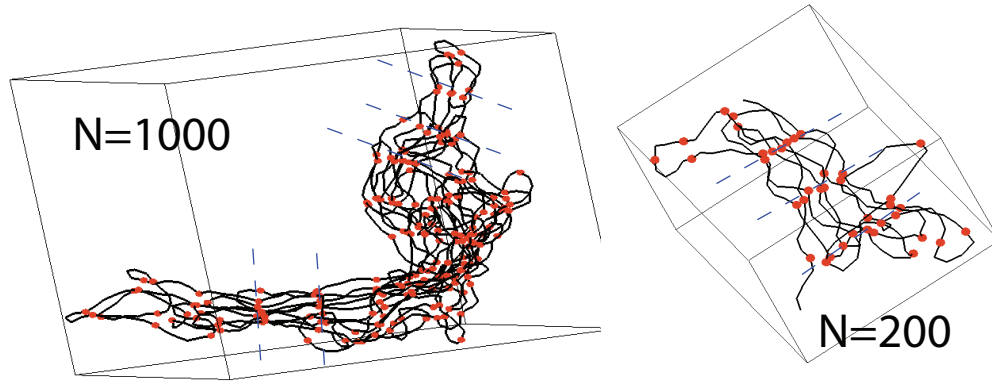

Figure 3: *Anisotropic structuring of the interacting sites.* In the case of chromatin fiber with periodic location of interacting sites, for  $\Delta \sim l_p$ , one finds peculiar chromosomal structuring where the interacting sites are organized along 1D lines or 2D planes as indicated by the blue dashes. This figure reports two snapshots of a typical conformation in the steady state for the  $l_p = 150$  nm chromatin fiber with  $\Delta = l_p$ ,  $d^* = 10$  nm and  $V_0 = 3.5 k_B T$ . Left panel:  $L = 30 \mu m$ . Right panel:  $L = 6 \mu m$ .
