# Supplementary material for: Spatial and Topological Organization of DNA Chains Induced by Gene Co-localization
Source: PubMed Central journal article supplement (PMC2820526; doi:10.1371/journal.pcbi.1000678), 2010-02-12
Supplement: pcbi.1000678.s006.pdf [file pcbi.1000678.s006.pdf]

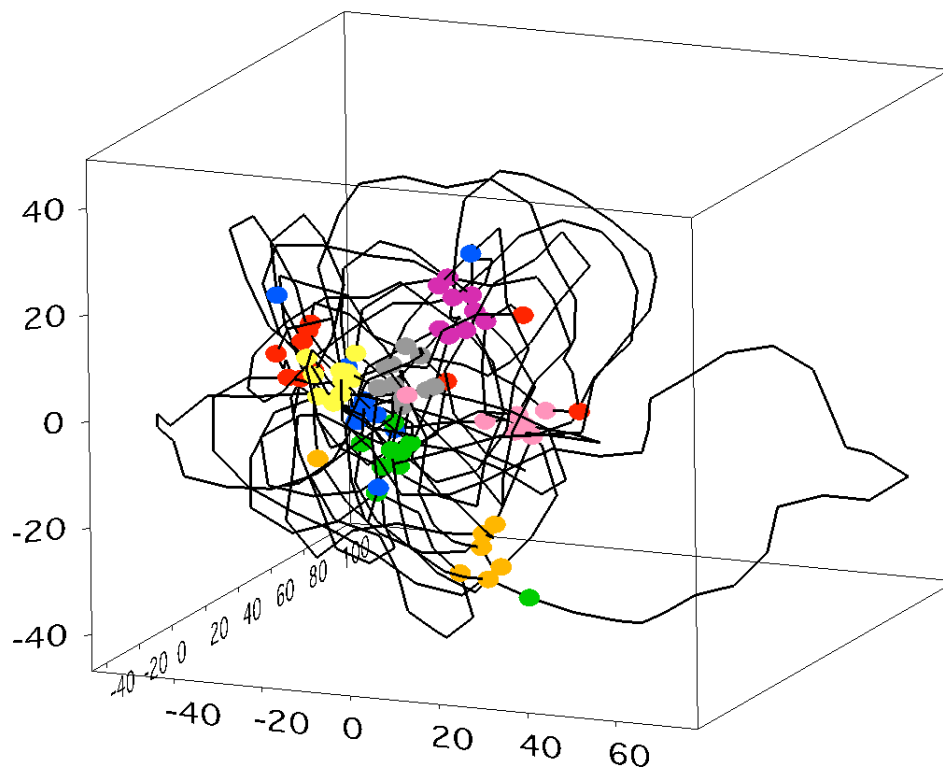

Figure 5: Typical spatial conformation for both the polymer and the interacting sites in a steady state for a random positioning of the sites. Note that several sites do not belong to any focus. Naked DNA,  $N_t = 8$ ,  $d^* = 6$  nm,  $L = 8$   $\mu$ m and  $\lambda = 2l_p$ .
